# Supplementary material for: US FDA Advisory Panel Members’ Assessment of Premarket Approval Process and Suggestions for Improvement
Source: PubMed Central journal article supplement (PMC11581643; doi:10.1001/jamanetworkopen.2024.36066), 2024-10-09
Supplement: jamanetwopen-e2436066-s002.pdf [file jamanetwopen-e2436066-s002.pdf]

## Data Sharing Statement

Alam. US FDA Advisory Panel Members' Assessment of Premarket Approval Process and Suggestions for Improvement. *JAMA Netw Open*. Published October 09, 2024.

doi:10.1001/jamanetworkopen.2024.36066

### Data

**Data available:** Yes

**Data types:** Deidentified participant data

**How to access data:** m-[alam@northwestern.edu](mailto:m-alam@northwestern.edu)

**When available:** With publication

### Supporting Documents

**Document types:** None

### Additional Information

**Who can access the data:** anyone requesting the data

**Types of analyses:** for any purpose or for a specified purpose

**Mechanisms of data availability:** with a signed data access agreement
